# Supplementary material for: Gut microbiota determines the social behavior of mice and induces metabolic and inflammatory changes in their adipose tissue
Source: PubMed Central journal article supplement (PMC7979825; doi:10.1038/s41522-021-00193-9), 2021-03-19
Supplement: 41522_2021_193_MOESM1_ESM.pdf [file 41522_2021_193_MOESM1_ESM.pdf]

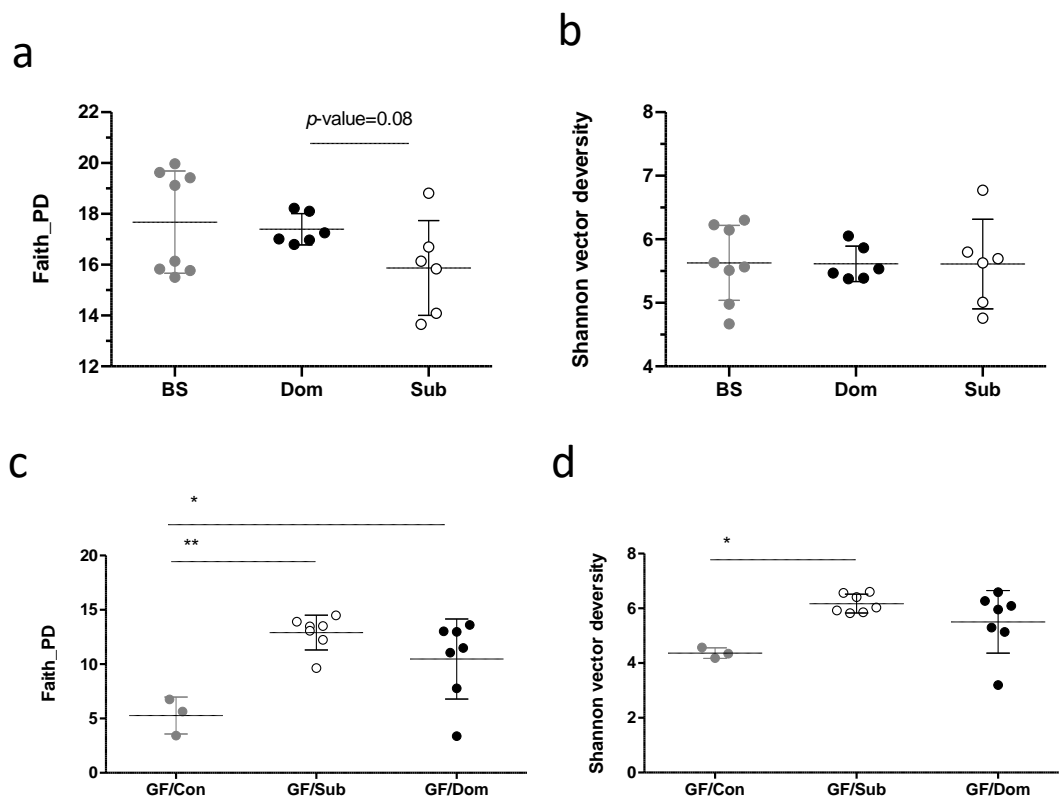

**Supplementary Figure 1. Alpha diversity of Dom and Sub mice and swiss webster transplanted mice after FMT.** (a) Faith PD analysis of BS, Dom and Sub mice gut microbiome. (b) Shannon vector analysis of BS, Dom and Sub mice gut microbiome. (c) Faith PD analysis of GF/Con, GF/Dom and GF/Sub mice gut microbiome. (d) Shannon vector analysis of BS, Dom and Sub mice gut microbiome. Statistical significance was assessed using a Student's t-test. (\*)  $p < 0.05$ , (\*\*)  $p < 0.01$ .

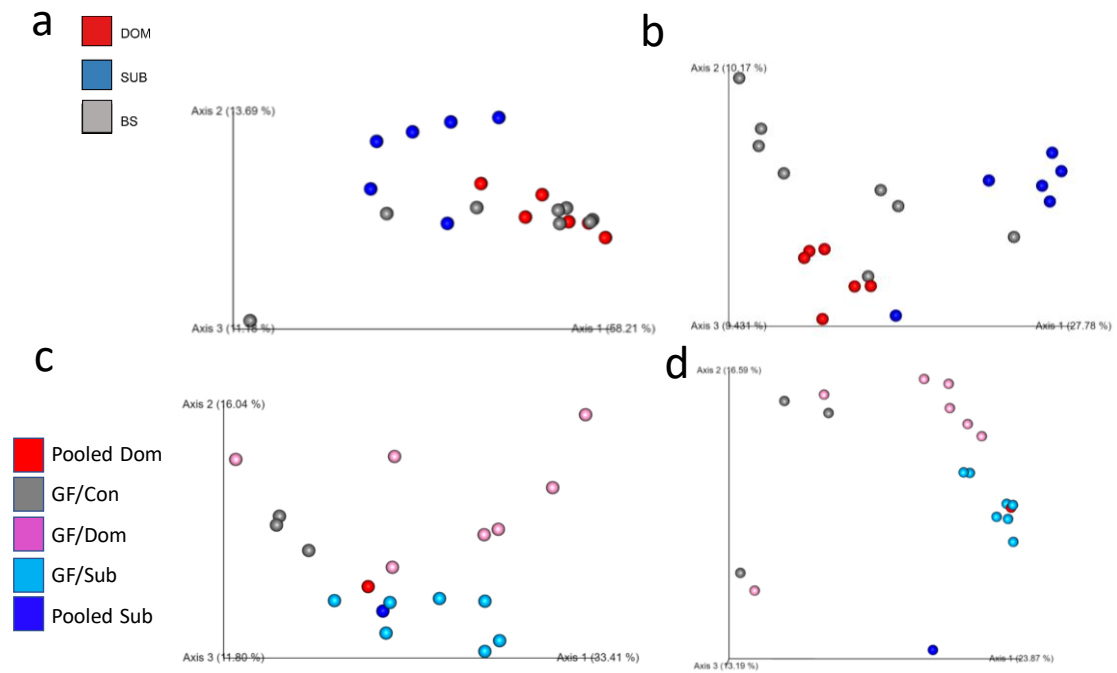

**Supplementary Figure 2. Beta diversity of Dom and Sub mice and Swiss Webster GF mice after FMT.** (a) weighted analysis of BS, Dom and Sub mice gut microbiome (b) unweighted analysis of BS, Dom and Sub mice gut microbiome. (c) weighted analysis of GF/Con, GF/Dom and GF/Sub mice gut microbiome. (d) unweighted of GF/Con, GF/Dom and GF/Sub mice gut microbiome. All PCA graphs were generated using Qiime2 software.

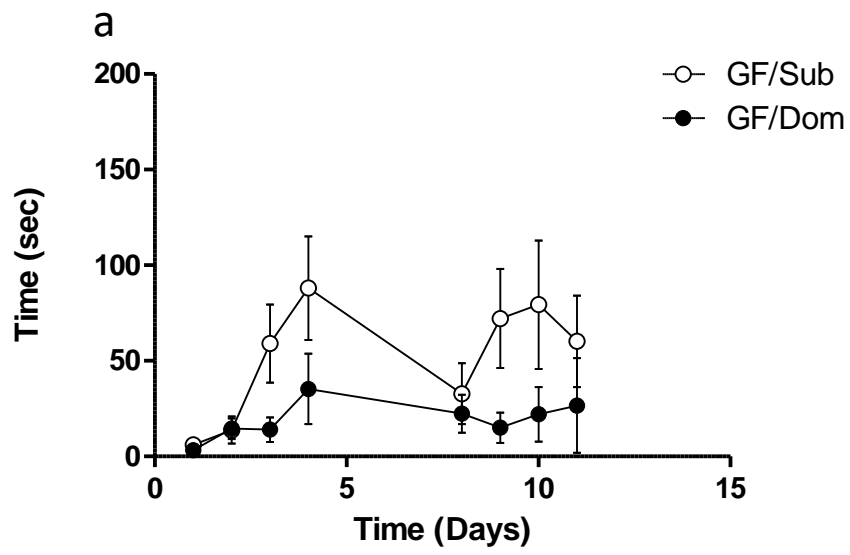

**Supplementary Figure 3. Behavioral tests of GF/con GF/Dom and GF/Sub mice.** (a) GF/Dom (n=6) and GF/Sub (n=6) mice possess a similar drinking time ( $p>0.05$ ). Statistical significance was assessed using Two-way ANOVA following a Bonferroni test.

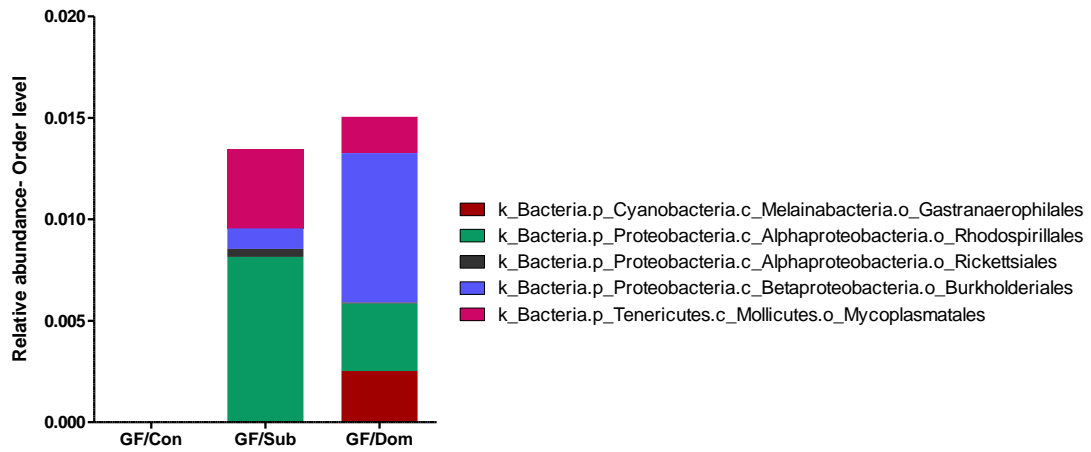

**Supplementary Figure 4. Gut microbiome composition of germ-free mice after an FMT from Dom or Sub donor mice.** The relative abundance up to the order level. Only the significantly different orders between GF/Dom and GF/Sub mice are presented. Statistical significance was assessed using a student's *t*-test.
